# Supplementary material
Source: PubMed Central journal article supplement (PMC8316520)
Supplement: 13534_2021_195_MOESM2_ESM.pdf [file 13534_2021_195_MOESM2_ESM.pdf]

**Supplemental Table 1.** Patient characteristics of MR-dCT paired dataset

| Characteristics       | Parameter                   | Value or patient number |
|-----------------------|-----------------------------|-------------------------|
| <i>Abdomen (n=30)</i> |                             |                         |
| Age                   | Mean $\pm$ Std              | 66 $\pm$ 10             |
| Sex                   | Male                        | 19                      |
|                       | Female                      | 11                      |
| Diagnosis             | Pancreatic cancer           | 14                      |
|                       | Klatskin tumor              | 4                       |
|                       | Liver lymph node metastasis | 4                       |
|                       | Hepatocellular carcinoma    | 3                       |
|                       | Gallbladder cancer          | 2                       |
|                       | Other                       | 3                       |
| Treatment technique   | IMRT                        | 17                      |
|                       | SBRT                        | 13                      |
| Prescription dose     | 50 Gy / 5 fx                | 5                       |
|                       | 45 Gy / 5 fx                | 5                       |
|                       | 40 Gy / 5 fx                | 2                       |
|                       | 37.5 Gy / 5 fx              | 1                       |
|                       | 60 Gy / 30 fx               | 2                       |
|                       | 56 Gy / 28 fx               | 4                       |
|                       | 54 Gy / 27 fx               | 2                       |
|                       | 50 Gy / 25 fx               | 5                       |
|                       | 30 Gy / 5 fx                | 1                       |
|                       | 27.5 Gy / 5 fx              | 1                       |

|                      |                     |        |
|----------------------|---------------------|--------|
|                      | 20 Gy / 5 fx        | 1      |
|                      | 40 Gy / 8 fx        | 1      |
| <i>Thorax (n=30)</i> |                     |        |
| Age                  | Mean ± Std          | 59 ± 5 |
| Sex                  | M                   | 0      |
|                      | F                   | 30     |
| Diagnosis            | Right breast cancer | 18     |
|                      | Left breast cancer  | 12     |
| Treatment technique  | APBI using IMRT     | 30     |
| Prescription dose    | 38.5 Gy / 10 fx     | 30     |
| <i>Pelvis (n=30)</i> |                     |        |
| Age                  | Mean ± Std          | 74 ± 6 |
| Sex                  | M                   | 30     |
|                      | F                   | 0      |
| Diagnosis            | Prostate cancer     | 30     |
| Treatment technique  | IMRT                | 9      |
|                      | IMRT with SIB       | 13     |
|                      | SBRT                | 8      |
| Prescription dose    | 70 Gy / 28 fx       | 20     |
|                      | 62.5 Gy / 25 fx     | 2      |
|                      | 36.25 Gy / 5 fx     | 8      |

IMRT = Intensity Modulated Radiation Therapy, SBRT = Stereotactic Body Radiation Therapy, APBI = Accelerated partial breast irradiation, SIB = Simultaneous-integrated boost

**Supplemental Table 2.** Gamma passing rate between dCT (reference) and sCT dose distributions

| Gamma criteria               | Dose > 10%  | Dose > 50%  | Dose > 90%  |
|------------------------------|-------------|-------------|-------------|
| Total                        |             |             |             |
| dCT vs. sCT <sub>U-net</sub> |             |             |             |
| γ 2mm / 2%                   | 94.1 ± 9.10 | 75.6 ± 29.0 | 52.7 ± 33.9 |
| γ 3mm / 3%                   | 97.9 ± 3.99 | 87.0 ± 23.9 | 71.8 ± 38.3 |
| dCT vs. sCT <sub>CyGAN</sub> |             |             |             |
| γ 2mm / 2%                   | 99.1 ± 0.89 | 98.3 ± 1.37 | 96.6 ± 2.91 |
| γ 3mm / 3%                   | 99.7 ± 0.52 | 99.8 ± 0.34 | 99.8 ± 0.21 |
| Pelvis                       |             |             |             |
| dCT vs. sCT <sub>U-net</sub> |             |             |             |
| γ 2mm / 2%                   | 98.0 ± 1.15 | 93.7 ± 6.89 | 70.0 ± 26.0 |
| γ 3mm / 3%                   | 99.3 ± 0.61 | 98.9 ± 1.92 | 91.9 ± 11.3 |
| dCT vs. sCT <sub>CyGAN</sub> |             |             |             |
| γ 2mm / 2%                   | 98.4 ± 0.95 | 98.9 ± 0.92 | 99.5 ± 1.39 |
| γ 3mm / 3%                   | 99.3 ± 0.71 | 99.9 ± 0.11 | 99.9 ± 0.04 |
| Thorax                       |             |             |             |
| dCT vs. sCT <sub>U-net</sub> |             |             |             |
| γ 2mm / 2%                   | 97.2 ± 1.35 | 84.7 ± 8.14 | 63.9 ± 17.4 |
| γ 3mm / 3%                   | 99.6 ± 0.30 | 97.2 ± 2.52 | 90.5 ± 13.3 |
| dCT vs. sCT <sub>CyGAN</sub> |             |             |             |
| γ 2mm / 2%                   | 99.5 ± 0.51 | 98.3 ± 0.67 | 97.9 ± 0.89 |
| γ 3mm / 3%                   | 99.9 ± 0.10 | 99.9 ± 0.10 | 99.9 ± 0.05 |
| Abdomen                      |             |             |             |
| dCT vs. sCT <sub>U-net</sub> |             |             |             |

|                              |                 |                 |                 |
|------------------------------|-----------------|-----------------|-----------------|
| $\gamma$ 2mm / 2%            | $86.9 \pm 13.0$ | $48.5 \pm 35.5$ | $24.2 \pm 35.2$ |
| $\gamma$ 3mm / 3%            | $94.7 \pm 5.64$ | $65.0 \pm 31.3$ | $33.1 \pm 44.1$ |
| dCT vs. sCT <sub>CyGAN</sub> |                 |                 |                 |
| $\gamma$ 2mm / 2%            | $99.4 \pm 0.67$ | $97.7 \pm 1.90$ | $93.5 \pm 2.72$ |
| $\gamma$ 3mm / 3%            | $99.9 \pm 0.21$ | $99.5 \pm 0.50$ | $99.6 \pm 0.22$ |
